# Supplementary material for: Potassium is a key signal in host-microbiome dysbiosis in periodontitis
Source: PubMed Central journal article supplement (PMC5493431; doi:10.1371/journal.ppat.1006457), 2017-06-20
Supplement: ppat.1006457.s002.pdf [file ppat.1006457.s002.pdf]

# Sequencing depth & Expression quantification

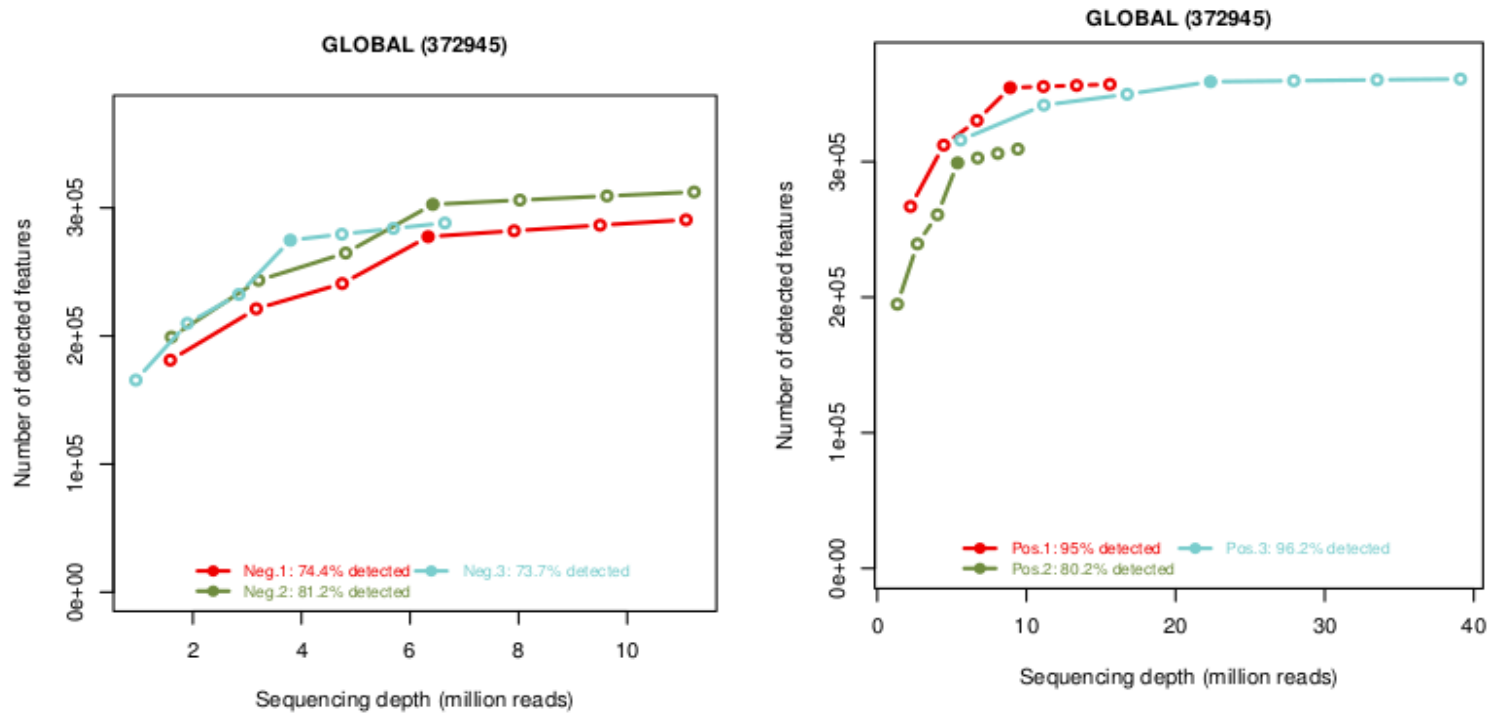

A) Saturation plot for protein-coding genes for all samples

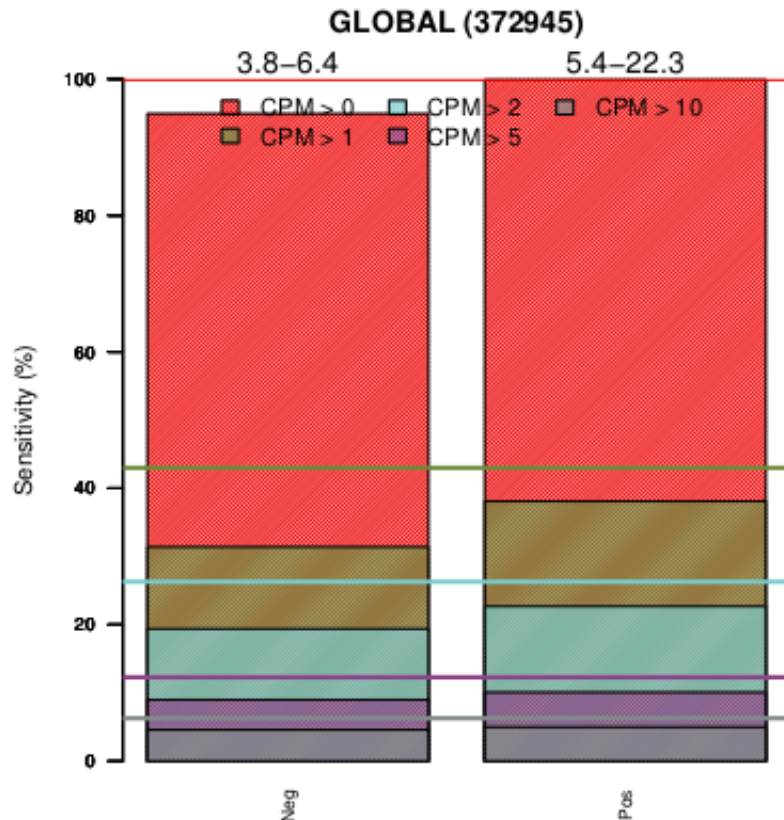

B) Sensitivity plot. Percentage of features having more than 0,1,2,5 and 10 counts per million (CPM)
