# Supplementary material for: Potassium is a key signal in host-microbiome dysbiosis in periodontitis
Source: PubMed Central journal article supplement (PMC5493431; doi:10.1371/journal.ppat.1006457), 2017-06-20
Supplement: ppat.1006457.s003.pdf [file ppat.1006457.s003.pdf]

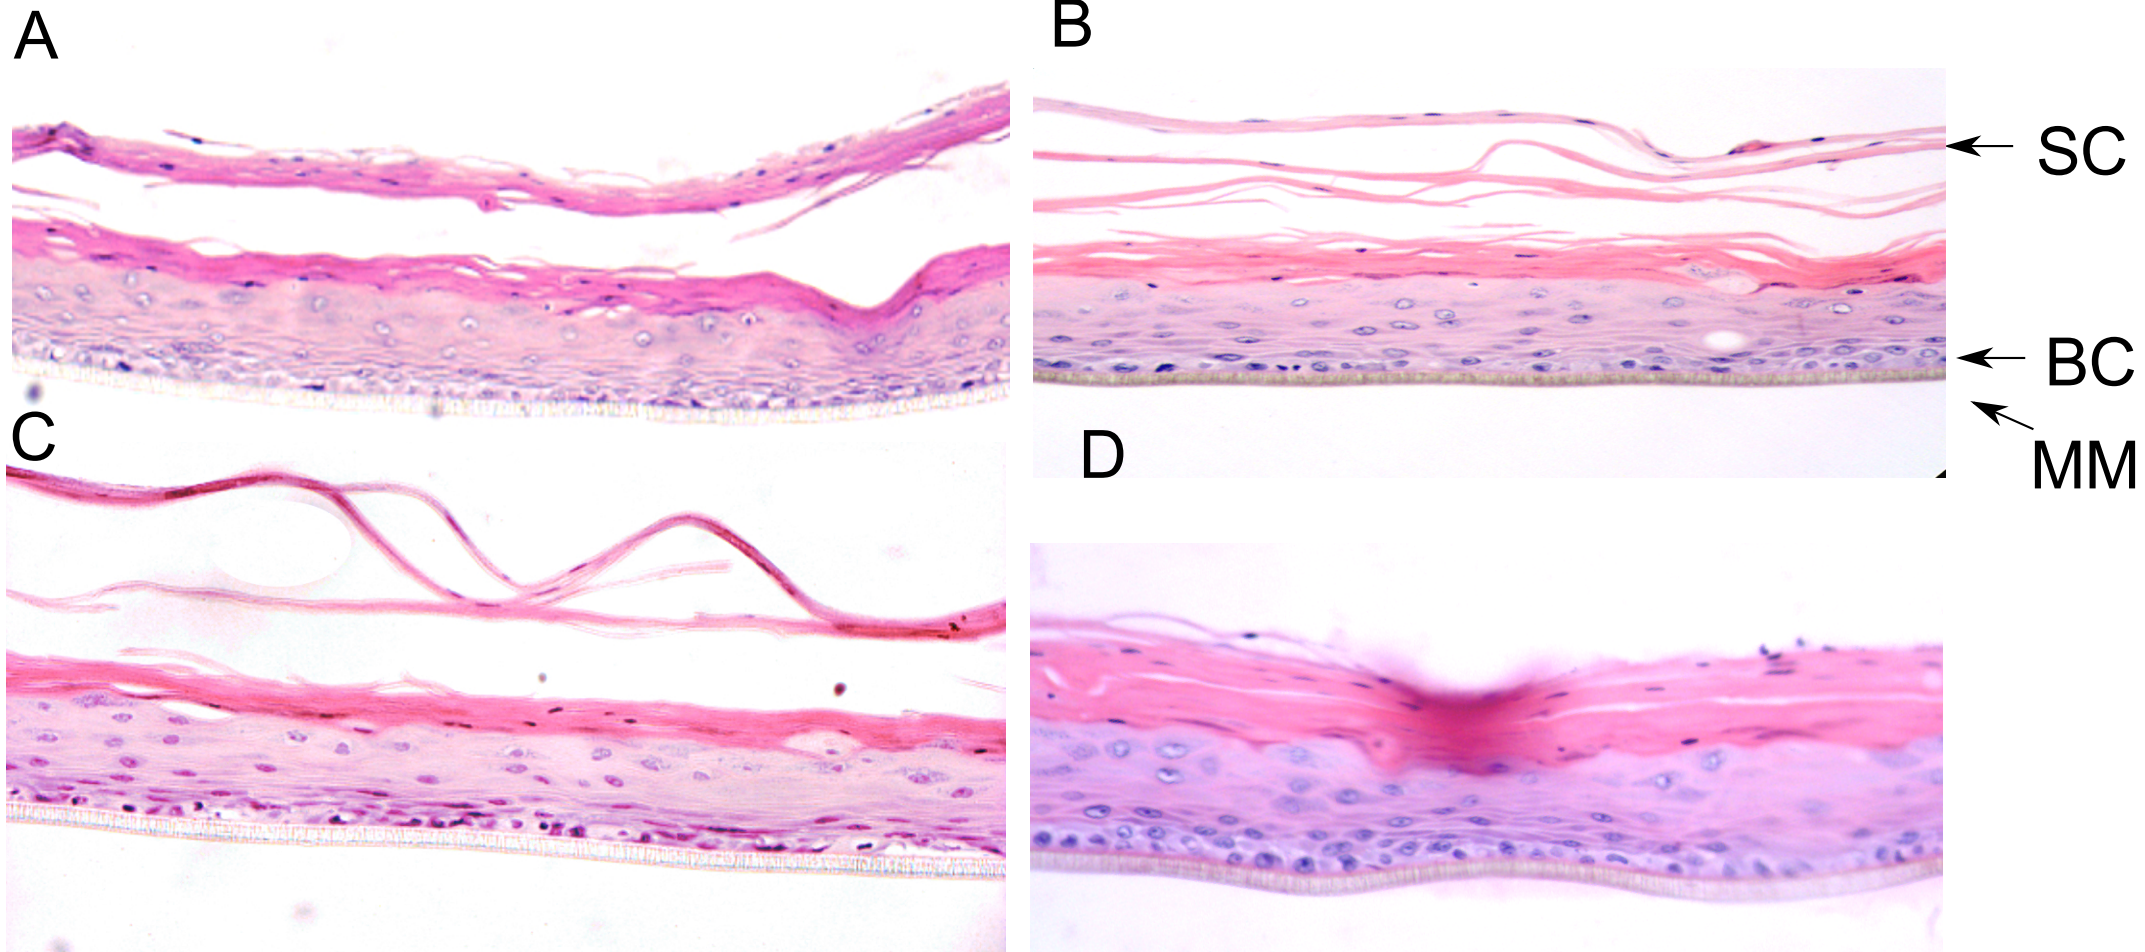

**S2 Fig.** Haematoxylin-eosin stained sections of the 3D gingival tissue model.

A) 0mM No plaque 20x,

B) 50mM No Plaque 20x

C) 0mM Plaque 20x

D) 50mM Plaque 20x

Key: SC, Stratum corneum, BC, Basal cells, MM, Microporous membrane
