# Supplementary material for: Potassium is a key signal in host-microbiome dysbiosis in periodontitis
Source: PubMed Central journal article supplement (PMC5493431; doi:10.1371/journal.ppat.1006457), 2017-06-20
Supplement: ppat.1006457.s004.pdf [file ppat.1006457.s004.pdf]

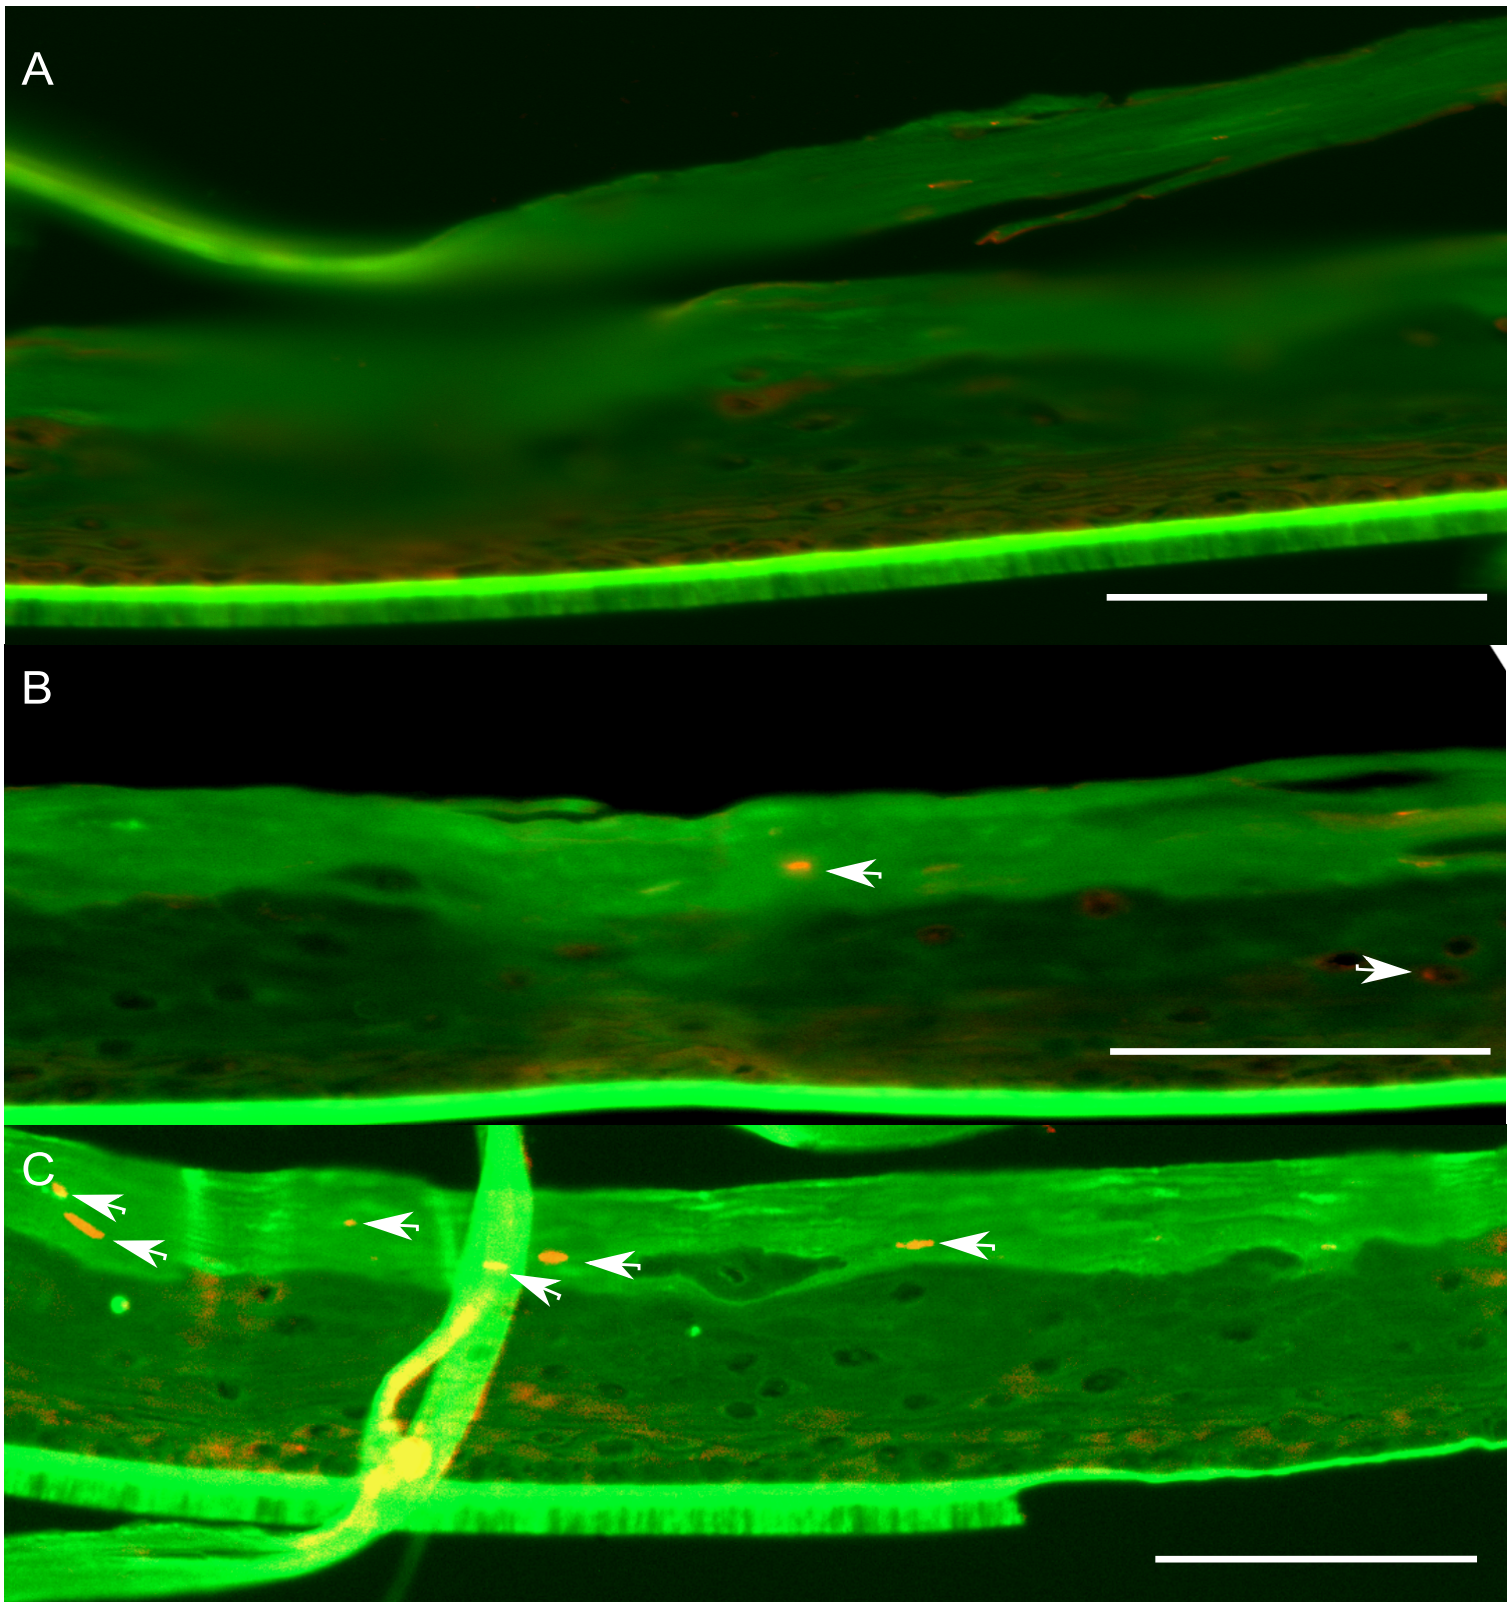

**S3 Fig.** FISH of tissue culture invasion. Brightly fluorescent cell-associated bacteria seen with the EUB338 probe.

Green autofluorescence background from the tissue.

A) 0 K<sup>+</sup> added + No plaque.

B) 0 K<sup>+</sup> added + plaque.

C) 50mM K<sup>+</sup> added + plaque.

Scale bar = 50  $\mu$ m. Magnification 400x
