# Supplementary material for: Potassium is a key signal in host-microbiome dysbiosis in periodontitis
Source: PubMed Central journal article supplement (PMC5493431; doi:10.1371/journal.ppat.1006457), 2017-06-20
Supplement: ppat.1006457.s005.pdf [file ppat.1006457.s005.pdf]

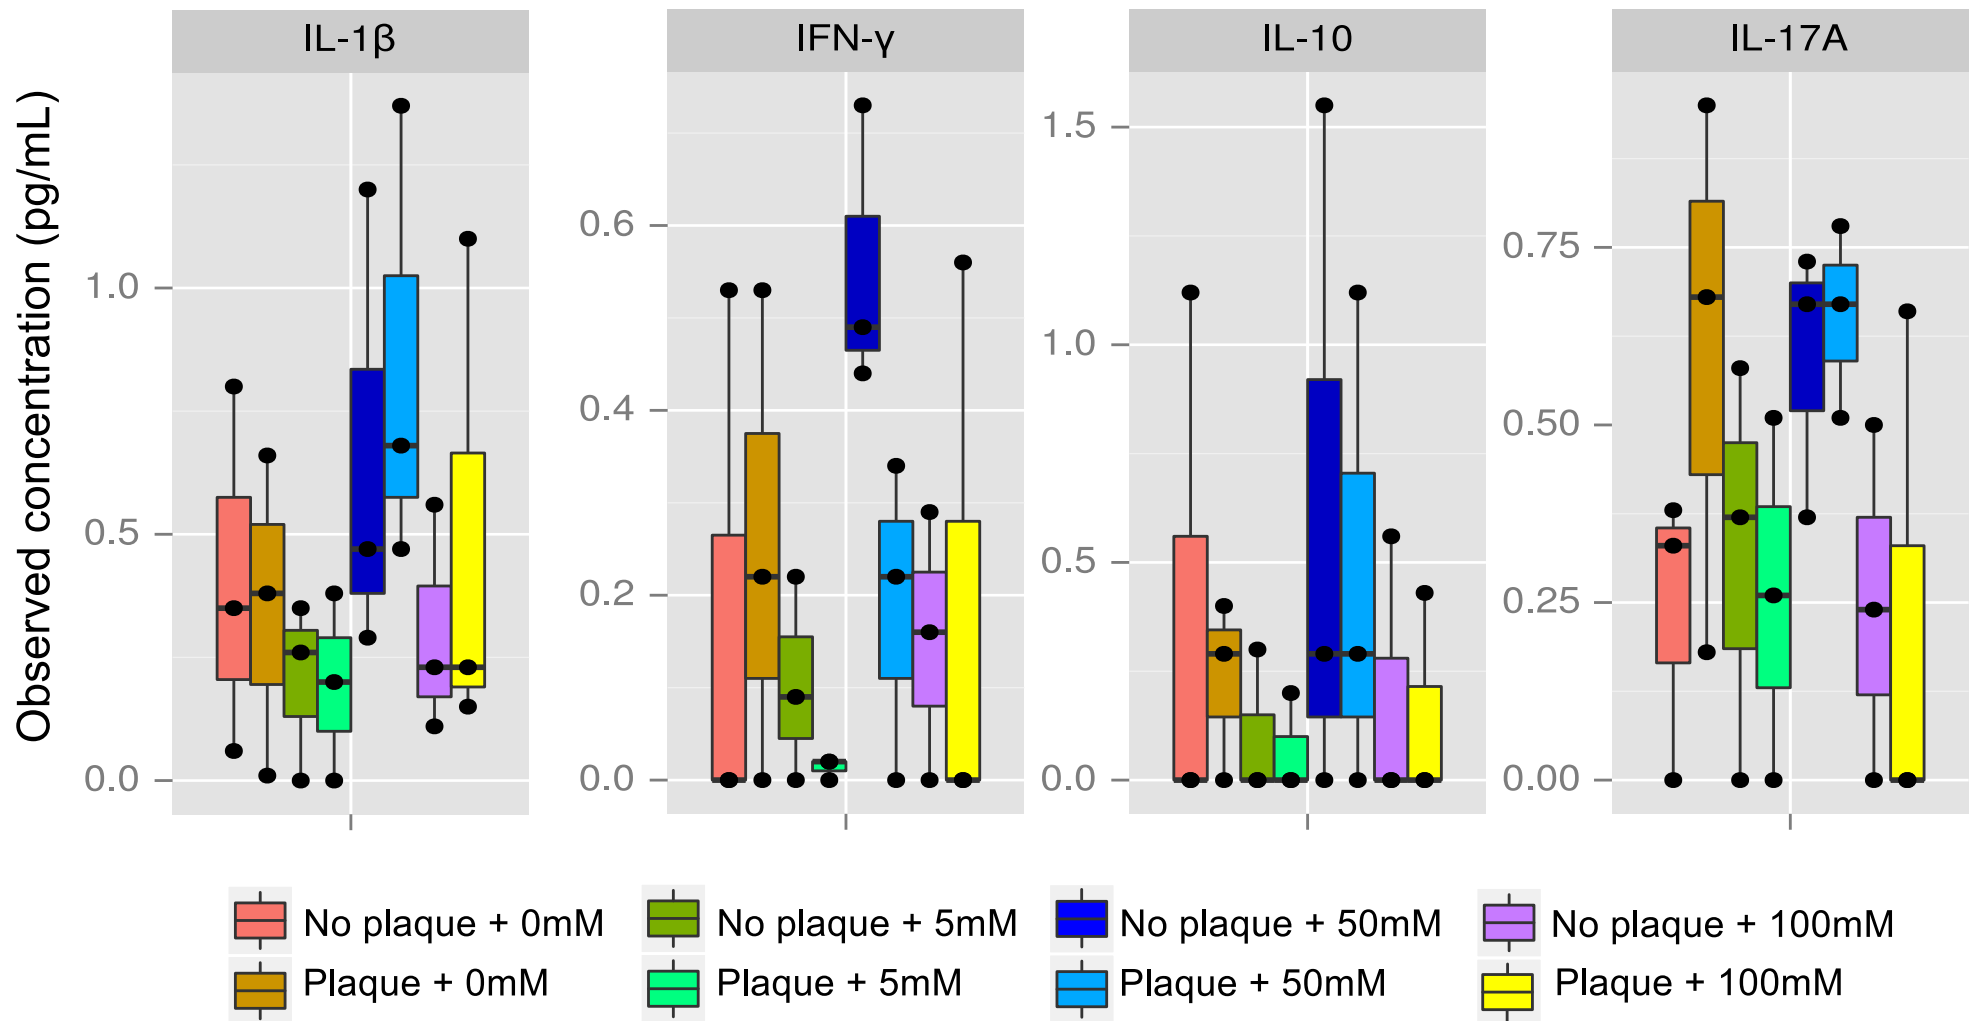

**S4 Fig. Effect of potassium concentration on gingival cytokine expression.**

A three-dimensional multilayered gingival tissue model with cornified apical layers (EpiGingival, MatTek Corporation) was used to assess the effect of different concentrations of K<sup>+</sup> and bacteria on the profiles of expression of different cytokines. Cytokine expression was measured by Luminex under different K<sup>+</sup> concentrations.

Box plots show the values of observed concentrations in the media of the different cytokines assayed.
