# Supplementary material for: Potassium is a key signal in host-microbiome dysbiosis in periodontitis
Source: PubMed Central journal article supplement (PMC5493431; doi:10.1371/journal.ppat.1006457), 2017-06-20
Supplement: ppat.1006457.s006.pdf [file ppat.1006457.s006.pdf]

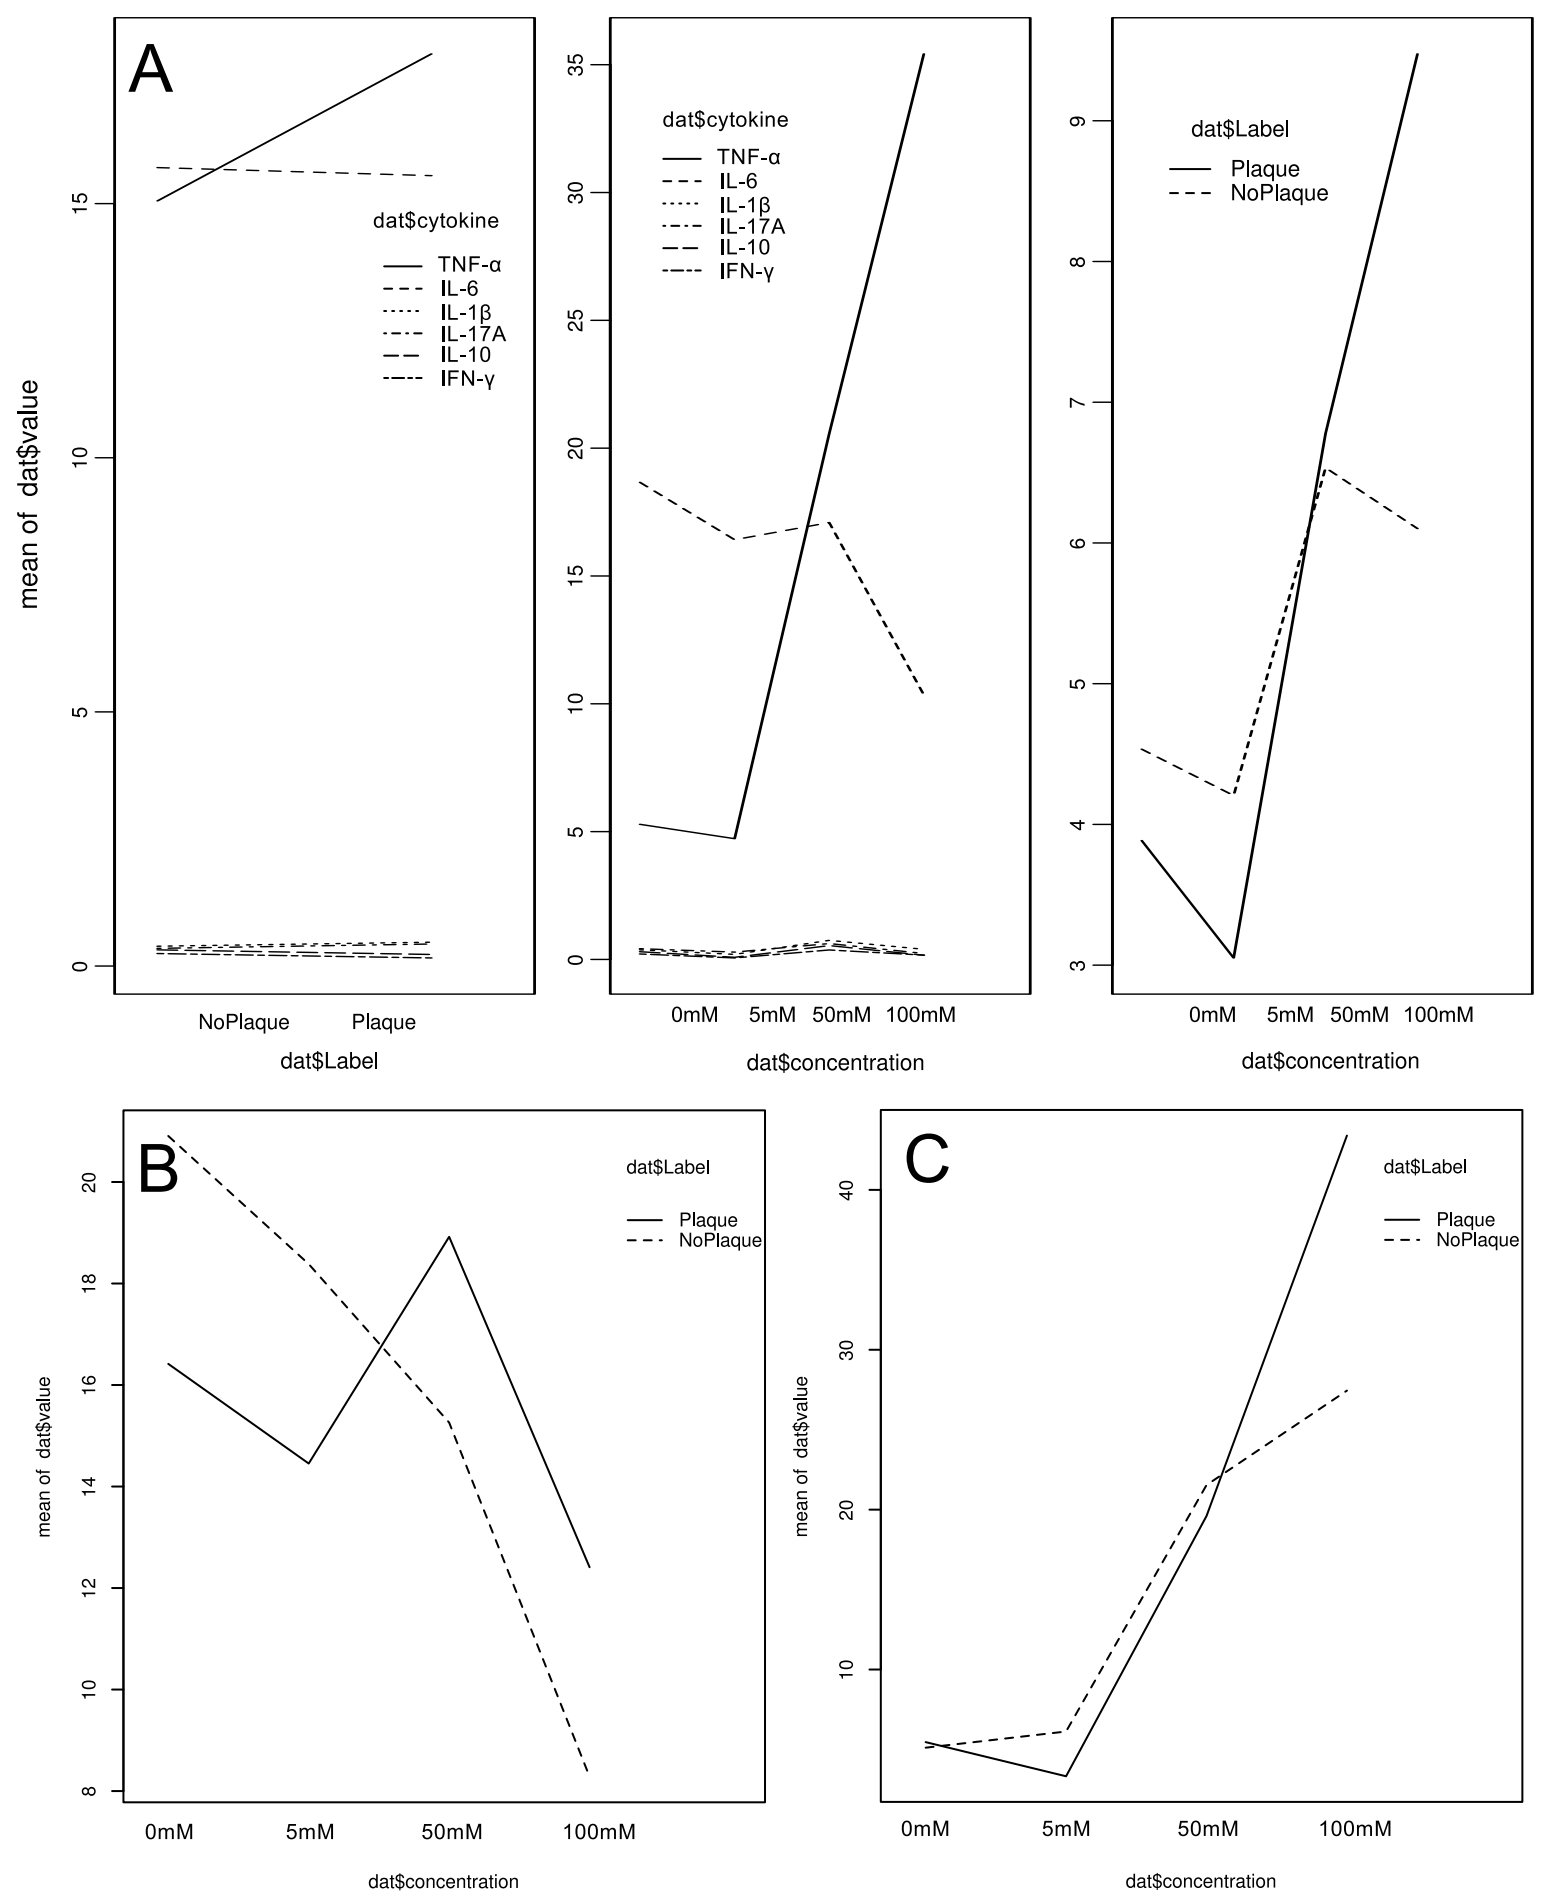

**S5 Fig. Interaction analysis Labels (plaque/no plaque) and potassium concentration.**

A) Interaction plots displaying the levels of one factor on the x-axis and the mean response on the y-axis for all cytokines analyzed.

B) Interaction plots displaying the levels of one factor on the x-axis and the mean response on the y-axis for IL-6.

C) Interaction plots displaying the levels of one factor on the x-axis and the mean response on the y-axis for TNF- $\alpha$ .
