# Supplementary material for: Potassium is a key signal in host-microbiome dysbiosis in periodontitis
Source: PubMed Central journal article supplement (PMC5493431; doi:10.1371/journal.ppat.1006457), 2017-06-20

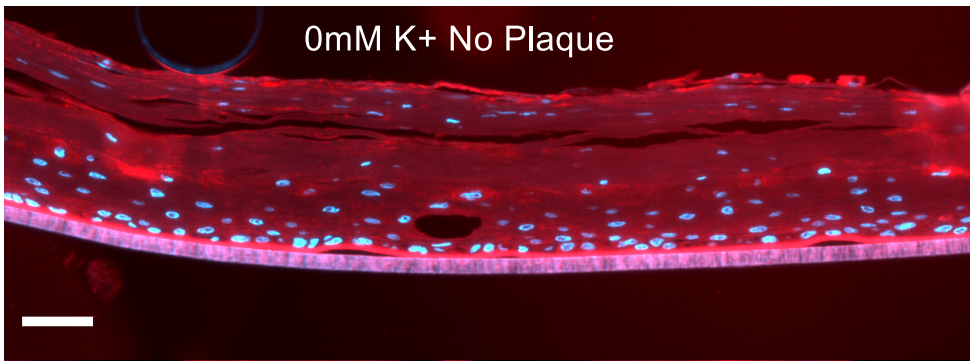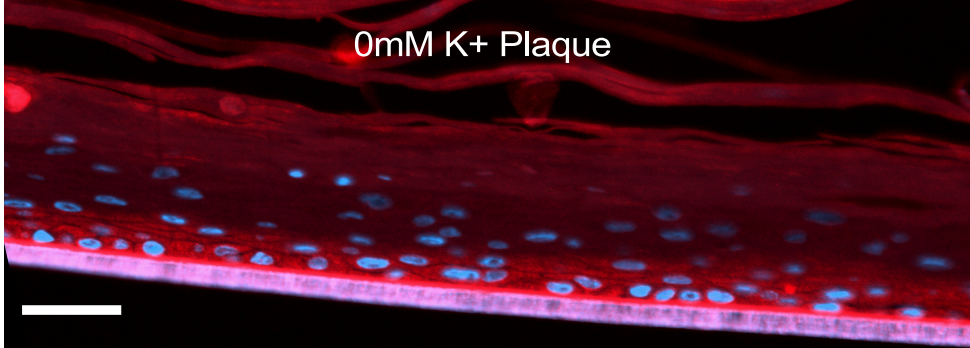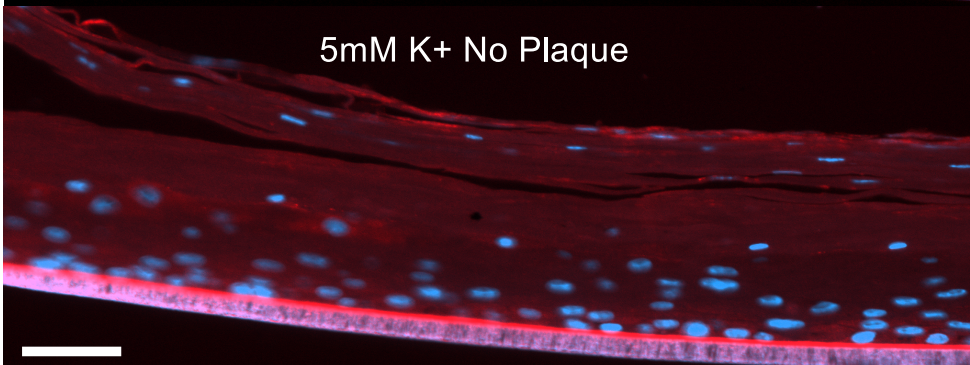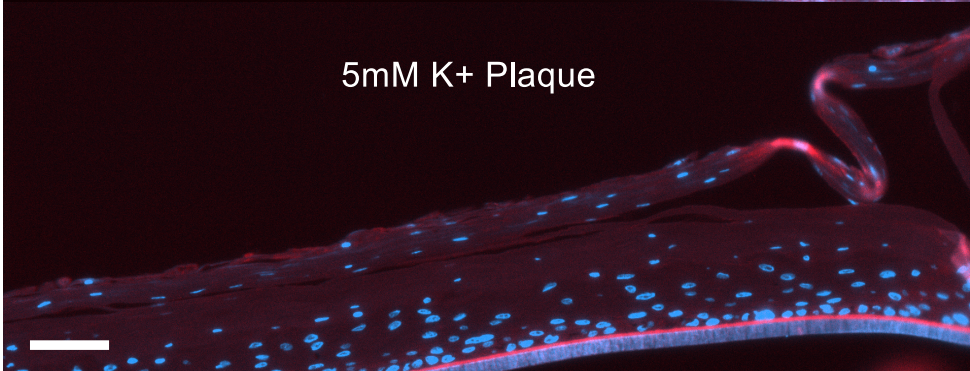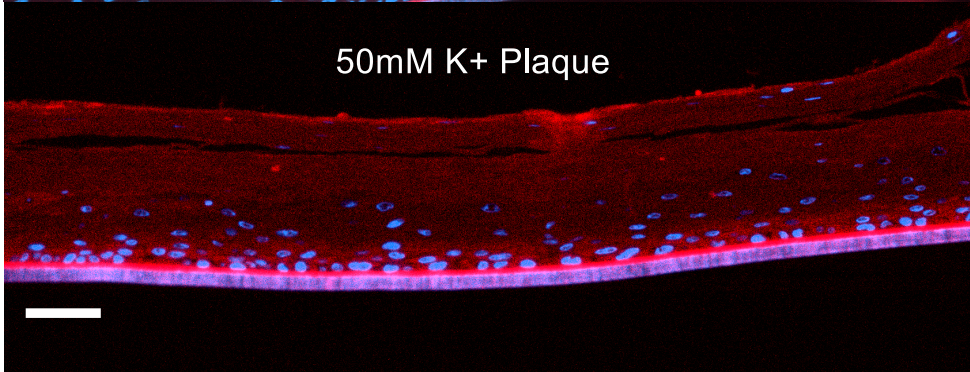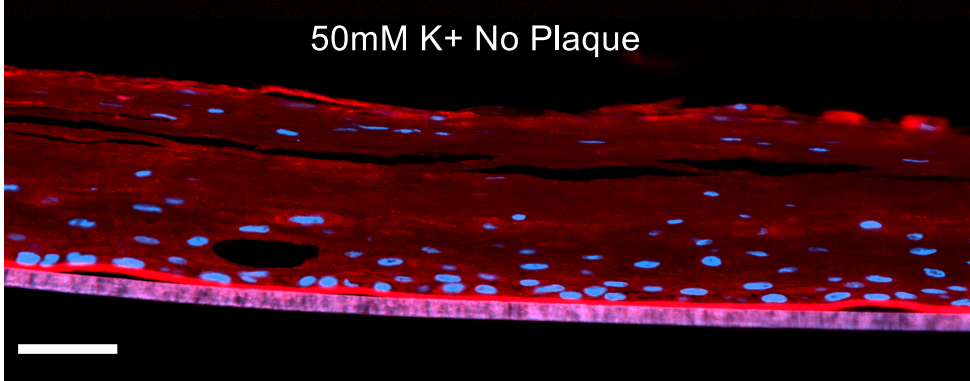

Supplement: ppat.1006457.s008.pdf [file ppat.1006457.s008.pdf]
