# Supplementary material for: Potassium is a key signal in host-microbiome dysbiosis in periodontitis
Source: PubMed Central journal article supplement (PMC5493431; doi:10.1371/journal.ppat.1006457), 2017-06-20
Supplement: ppat.1006457.s009.pdf [file ppat.1006457.s009.pdf]

S1 Table. Summary of Molecular Function Gene Ontology (GO) terms enriched in the presence of potassium. 50mM of K<sup>+</sup> were added to dental plaque on saliva and incubated for 3 hours at 37°C in anaerobic conditions. GO terms enrichment analysis was performed as described in the Methods section.

| <b>GO terms Over-represented in the presence of 50mM K<sup>+</sup> added</b> |                                                                                |
|------------------------------------------------------------------------------|--------------------------------------------------------------------------------|
| <b>Gene Ontology (GO) ID</b>                                                 | <b>Description</b>                                                             |
| GO:0003711                                                                   | transcription elongation regulator activity                                    |
| GO:0043365                                                                   | [formate-C-acetyltransferase]-activating enzyme activity                       |
| GO:0030604                                                                   | 1-deoxy-D-xylulose-5-phosphate reductoisomerase activity                       |
| GO:0008661                                                                   | 1-deoxy-D-xylulose-5-phosphate synthase activity                               |
| GO:0016308                                                                   | 1-phosphatidylinositol-4-phosphate 5-kinase activity                           |
| GO:0050518                                                                   | 2-C-methyl-D-erythritol 4-phosphate cytidyltransferase activity                |
| GO:0047553                                                                   | 2-oxoglutarate synthase activity                                               |
| GO:0008676                                                                   | 3-deoxy-8-phosphooctulonate synthase activity                                  |
| GO:0008690                                                                   | 3-deoxy-manno-octulosonate cytidyltransferase activity                         |
| GO:0019143                                                                   | 3-deoxy-manno-octulosonate-8-phosphatase activity                              |
| GO:0003864                                                                   | 3-methyl-2-oxobutanoate hydroxymethyltransferase activity                      |
| GO:0004315                                                                   | 3-oxoacyl-[acyl-carrier-protein] synthase activity                             |
| GO:0004134                                                                   | 4-alpha-glucanotransferase activity                                            |
| GO:0008703                                                                   | 5-amino-6-(5-phosphoribosylamino)uracil reductase activity                     |
| GO:0003872                                                                   | 6-phosphofructokinase activity                                                 |
| GO:0008780                                                                   | acyl-[acyl-carrier-protein]-UDP-N-acetylglucosamine O-acyltransferase activity |
| GO:0000774                                                                   | adenyl-nucleotide exchange factor activity                                     |
| GO:0004017                                                                   | adenylate kinase activity                                                      |
| GO:0004019                                                                   | adenylosuccinate synthase activity                                             |
| GO:0004813                                                                   | alanine-tRNA ligase activity                                                   |
| GO:0004560                                                                   | alpha-L-fucosidase activity                                                    |
| GO:0004177                                                                   | aminopeptidase activity                                                        |
| GO:0004814                                                                   | arginine-tRNA ligase activity                                                  |
| GO:0004067                                                                   | asparaginase activity                                                          |
| GO:0004816                                                                   | asparagine-tRNA ligase activity                                                |
| GO:0005524                                                                   | ATP binding                                                                    |
| GO:0018522                                                                   | benzoyl-CoA reductase activity                                                 |
| GO:0004563                                                                   | beta-N-acetylhexosaminidase activity                                           |
| GO:0005488                                                                   | binding                                                                        |
| GO:0004076                                                                   | biotin synthase activity                                                       |
| GO:0004084                                                                   | branched-chain-amino-acid transaminase activity                                |

|            |                                                                            |
|------------|----------------------------------------------------------------------------|
| GO:0003824 | catalytic activity                                                         |
| GO:0051087 | chaperone binding                                                          |
| GO:0008817 | cob(I)yrinic acid a,c-diamide adenosyltransferase activity                 |
| GO:0048037 | cofactor binding                                                           |
| GO:0004124 | cysteine synthase activity                                                 |
| GO:0004127 | cytidylate kinase activity                                                 |
| GO:0008834 | di-trans,poly-cis-decaprenylcistransferase activity                        |
| GO:0008835 | diaminohydroxyphosphoribosylaminopyrimidine deaminase activity             |
| GO:0047850 | diaminopimelate dehydrogenase activity                                     |
| GO:0004149 | dihydrolipoyllysine-residue succinyltransferase activity                   |
| GO:0004156 | dihydropteroate synthase activity                                          |
| GO:0047334 | diphosphate-fructose-6-phosphate 1-phosphotransferase activity             |
| GO:0003917 | DNA topoisomerase type I activity                                          |
| GO:0003918 | DNA topoisomerase type II (ATP-hydrolyzing) activity                       |
| GO:0003899 | DNA-directed RNA polymerase activity                                       |
| GO:0008831 | dTDP-4-dehydrorhamnose reductase activity                                  |
| GO:0004170 | dUTP diphosphatase activity                                                |
| GO:0004311 | farnesyltranstransferase activity                                          |
| GO:0010181 | FMN binding                                                                |
| GO:0008861 | formate C-acetyltransferase activity                                       |
| GO:0004329 | formate-tetrahydrofolate ligase activity                                   |
| GO:0042132 | fructose 1,6-bisphosphate 1-phosphatase activity                           |
| GO:0004332 | fructose-bisphosphate aldolase activity                                    |
| GO:0004333 | fumarate hydratase activity                                                |
| GO:0050577 | GDP-L-fucose synthase activity                                             |
| GO:0004342 | glucosamine-6-phosphate deaminase activity                                 |
| GO:0008877 | glucose-1-phosphatase activity                                             |
| GO:0008879 | glucose-1-phosphate thymidyltransferase activity                           |
| GO:0004354 | glutamate dehydrogenase (NADP+) activity                                   |
| GO:0030409 | glutamate formimidoyltransferase activity                                  |
| GO:0004818 | glutamate-tRNA ligase activity                                             |
| GO:0004819 | glutamine-tRNA ligase activity                                             |
| GO:0004365 | glyceraldehyde-3-phosphate dehydrogenase (NAD+) (phosphorylating) activity |
| GO:0008890 | glycine C-acetyltransferase activity                                       |
| GO:0005525 | GTP binding                                                                |
| GO:0004416 | hydroxyacylglutathione hydrolase activity                                  |
| GO:0004418 | hydroxymethylbilane synthase activity                                      |

|            |                                                                  |
|------------|------------------------------------------------------------------|
| GO:0005315 | inorganic phosphate transmembrane transporter activity           |
| GO:0004512 | inositol-3-phosphate synthase activity                           |
| GO:0005216 | ion channel activity                                             |
| GO:0005381 | iron ion transmembrane transporter activity                      |
| GO:0030060 | L-malate dehydrogenase activity                                  |
| GO:0008743 | L-threonine 3-dehydrogenase activity                             |
| GO:0015129 | lactate transmembrane transporter activity                       |
| GO:0008928 | mannose-1-phosphate guanylyltransferase (GDP) activity           |
| GO:0008235 | metalloexopeptidase activity                                     |
| GO:0004478 | methionine adenosyltransferase activity                          |
| GO:0050097 | methylaspartate mutase activity                                  |
| GO:0004492 | methylmalonyl-CoA decarboxylase activity                         |
| GO:0004494 | methylmalonyl-CoA mutase activity                                |
| GO:0008168 | methyltransferase activity                                       |
| GO:0008747 | N-acetylneuraminate lyase activity                               |
| GO:0008137 | NADH dehydrogenase (ubiquinone) activity                         |
| GO:0000309 | nicotinamide-nucleotide adenylyltransferase activity             |
| GO:0042279 | nitrite reductase (cytochrome, ammonia-forming) activity         |
| GO:0050421 | nitrite reductase (NO-forming) activity                          |
| GO:0003676 | nucleic acid binding                                             |
| GO:0008171 | O-methyltransferase activity                                     |
| GO:0004648 | O-phospho-L-serine:2-oxoglutarate aminotransferase activity      |
| GO:0008948 | oxaloacetate decarboxylase activity                              |
| GO:0004591 | oxoglutarate dehydrogenase (succinyl-transferring) activity      |
| GO:0042586 | peptide deformylase activity                                     |
| GO:0003755 | peptidyl-prolyl cis-trans isomerase activity                     |
| GO:0004605 | phosphatidate cytidylyltransferase activity                      |
| GO:0004609 | phosphatidylserine decarboxylase activity                        |
| GO:0008963 | phospho-N-acetylmuramoyl-pentapeptide-transferase activity       |
| GO:0004612 | phosphoenolpyruvate carboxykinase (ATP) activity                 |
| GO:0004618 | phosphoglycerate kinase activity                                 |
| GO:0004634 | phosphopyruvate hydratase activity                               |
| GO:0004639 | phosphoribosylaminoimidazolesuccinocarboxamide synthase activity |
| GO:0004641 | phosphoribosylformylglycinamide cyclo-ligase activity            |
| GO:0004644 | phosphoribosylglycinamide formyltransferase activity             |
| GO:0004654 | polyribonucleotide nucleotidyltransferase activity               |
| GO:0004655 | porphobilinogen synthase activity                                |

|            |                                                                                          |
|------------|------------------------------------------------------------------------------------------|
| GO:0046026 | precorrin-4 C11-methyltransferase activity                                               |
| GO:0016994 | precorrin-6A reductase activity                                                          |
| GO:0005515 | protein binding                                                                          |
| GO:0008565 | protein transporter activity                                                             |
| GO:0046933 | proton-transporting ATP synthase activity, rotational mechanism                          |
| GO:0046961 | proton-transporting ATPase activity, rotational mechanism                                |
| GO:0004743 | pyruvate kinase activity                                                                 |
| GO:0004746 | riboflavin synthase activity                                                             |
| GO:0004748 | ribonucleoside-diphosphate reductase activity, thioredoxin disulfide as acceptor         |
| GO:0050262 | ribosylnicotinamide kinase activity                                                      |
| GO:0003723 | RNA binding                                                                              |
| GO:0016987 | sigma factor activity                                                                    |
| GO:0003697 | single-stranded DNA binding                                                              |
| GO:0016852 | sirohydrochlorin cobaltochelataase activity                                              |
| GO:0003735 | structural constituent of ribosome                                                       |
| GO:0004775 | succinate-CoA ligase (ADP-forming) activity                                              |
| GO:0009029 | tetraacyldisaccharide 4'-kinase activity                                                 |
| GO:0016740 | transferase activity                                                                     |
| GO:0016746 | transferase activity, transferring acyl groups                                           |
| GO:0003746 | translation elongation factor activity                                                   |
| GO:0003743 | translation initiation factor activity                                                   |
| GO:0003747 | translation release factor activity                                                      |
| GO:0004807 | triose-phosphate isomerase activity                                                      |
| GO:0004808 | tRNA (5-methylaminomethyl-2-thiouridylate)-methyltransferase activity                    |
| GO:0009019 | tRNA (guanine-N1-)-methyltransferase activity                                            |
| GO:0052381 | tRNA dimethylallyltransferase activity                                                   |
| GO:0009034 | tryptophanase activity                                                                   |
| GO:0008759 | UDP-3-O-[3-hydroxymyristoyl] N-acetylglucosamine deacetylase activity                    |
| GO:0003978 | UDP-glucose 4-epimerase activity                                                         |
| GO:0008765 | UDP-N-acetylmuramoylalanyl-D-glutamate-2,6-diaminopimelate ligase activity               |
| GO:0050511 | undecaprenyldiphospho-muramoylpentapeptide beta-N acetylglucosaminyltransferase activity |
| GO:0004849 | uridine kinase activity                                                                  |

| <b>GO terms Under-represented in the presence of 50mM K+ added</b> |                                                                  |
|--------------------------------------------------------------------|------------------------------------------------------------------|
| GO:0003988                                                         | acetyl-CoA C-acyltransferase activity                            |
| GO:0003985                                                         | acetyl-CoA C-acetyltransferase activity                          |
| GO:0004871                                                         | signal transducer activity                                       |
| GO:0030151                                                         | molybdenum ion binding                                           |
| GO:0008706                                                         | 6-phospho-beta-glucosidase activity                              |
| GO:0008422                                                         | beta-glucosidase activity                                        |
| GO:0004467                                                         | long-chain fatty acid-CoA ligase activity                        |
| GO:0008692                                                         | 3-hydroxybutyryl-CoA epimerase activity                          |
| GO:0004300                                                         | enoyl-CoA hydratase activity                                     |
| GO:0003857                                                         | 3-hydroxyacyl-CoA dehydrogenase activity                         |
| GO:0004334                                                         | fumarylacetoacetase activity                                     |
| GO:0008260                                                         | 3-oxoacid CoA-transferase activity                               |
| GO:0008748                                                         | N-ethylmaleimide reductase activity                              |
| GO:0004364                                                         | glutathione transferase activity                                 |
| GO:0009039                                                         | urease activity                                                  |
| GO:0003992                                                         | N2-acetyl-L-ornithine:2-oxoglutarate 5-aminotransferase activity |
| GO:0008955                                                         | peptidoglycan glycosyltransferase activity                       |
| GO:0008984                                                         | protein-glutamate methylesterase activity                        |
| GO:0008234                                                         | cysteine-type peptidase activity                                 |
| GO:0047121                                                         | isoquinoline 1-oxidoreductase activity                           |
| GO:0016041                                                         | glutamate synthase (ferredoxin) activity                         |
| GO:0008982                                                         | protein-N(PI)-phosphohistidine-sugar phosphotransferase activity |
| GO:0003960                                                         | NADPH:quinone reductase activity                                 |
| GO:0008726                                                         | alkanesulfonate monooxygenase activity                           |
| GO:0004029                                                         | aldehyde dehydrogenase (NAD) activity                            |
| GO:0008827                                                         | cytochrome o ubiquinol oxidase activity                          |
| GO:0004096                                                         | catalase activity                                                |
| GO:0047905                                                         | fructose-6-phosphate phosphoketolase activity                    |
| GO:0004485                                                         | methylcrotonoyl-CoA carboxylase activity                         |
| GO:0018849                                                         | muconate cycloisomerase activity                                 |
| GO:0004016                                                         | adenylate cyclase activity                                       |
| GO:0004165                                                         | dodecenoyl-CoA delta-isomerase activity                          |
| GO:0008470                                                         | isovaleryl-CoA dehydrogenase activity                            |
| GO:0050567                                                         | glutaminyl-tRNA synthase (glutamine-hydrolyzing) activity        |
| GO:0004066                                                         | asparagine synthase (glutamine-hydrolyzing) activity             |
| GO:0019154                                                         | glycolate dehydrogenase activity                                 |

|            |                                                                     |
|------------|---------------------------------------------------------------------|
| GO:0004108 | citrate (Si)-synthase activity                                      |
| GO:0008866 | fructuronate reductase activity                                     |
| GO:0008876 | quinoprotein glucose dehydrogenase activity                         |
| GO:0050193 | phosphoketolase activity                                            |
| GO:0004131 | cytosine deaminase activity                                         |
| GO:0004042 | acetyl-CoA:L-glutamate N-acetyltransferase activity                 |
| GO:0008080 | N-acetyltransferase activity                                        |
| GO:0008477 | purine nucleosidase activity                                        |
| GO:0008811 | chloramphenicol O-acetyltransferase activity                        |
| GO:0008679 | 2-hydroxy-3-oxopropionate reductase activity                        |
| GO:0004777 | succinate-semialdehyde dehydrogenase (NAD <sup>+</sup> ) activity   |
| GO:0008812 | choline dehydrogenase activity                                      |
| GO:0047265 | poly(glycerol-phosphate) alpha-glucosyltransferase activity         |
| GO:0004555 | alpha,alpha-trehalase activity                                      |
| GO:0008933 | lytic transglycosylase activity                                     |
| GO:0003879 | ATP phosphoribosyltransferase activity                              |
| GO:0016223 | beta-alanine-pyruvate transaminase activity                         |
| GO:0000908 | taurine dioxygenase activity                                        |
| GO:0004450 | isocitrate dehydrogenase (NADP <sup>+</sup> ) activity              |
| GO:0004022 | alcohol dehydrogenase (NAD) activity                                |
| GO:0008442 | 3-hydroxyisobutyrate dehydrogenase activity                         |
| GO:0004357 | glutamate-cysteine ligase activity                                  |
| GO:0008700 | 4-hydroxy-2-oxoglutarate aldolase activity                          |
| GO:0008677 | 2-dehydropantoate 2-reductase activity                              |
| GO:0008556 | potassium-transporting ATPase activity                              |
| GO:0004471 | malate dehydrogenase (decarboxylating) (NAD <sup>+</sup> ) activity |
| GO:0050566 | asparaginyI-tRNA synthase (glutamine-hydrolyzing) activity          |
| GO:0018623 | benzoate 1,2-dioxygenase activity                                   |
| GO:0004358 | glutamate N-acetyltransferase activity                              |
| GO:0009018 | sucrose phosphorylase activity                                      |
| GO:0018578 | protocatechuate 3,4-dioxygenase activity                            |
| GO:0003868 | 4-hydroxyphenylpyruvate dioxygenase activity                        |
| GO:0008802 | betaine-aldehyde dehydrogenase activity                             |
| GO:0003849 | 3-deoxy-7-phosphoheptulonate synthase activity                      |
| GO:0004015 | adenosylmethionine-8-amino-7-oxononanoate transaminase activity     |
| GO:0031071 | cysteine desulfurase activity                                       |
| GO:0008324 | cation transmembrane transporter activity                           |

|            |                                                      |
|------------|------------------------------------------------------|
| GO:0008514 | organic anion transmembrane transporter activity     |
| GO:0017057 | 6-phosphogluconolactonase activity                   |
| GO:0004622 | lysophospholipase activity                           |
| GO:0003942 | N-acetyl-gamma-glutamyl-phosphate reductase activity |
| GO:0009025 | tagatose-bisphosphate aldolase activity              |
| GO:0030729 | acetoacetate-CoA ligase activity                     |
| GO:0015079 | potassium ion transmembrane transporter activity     |
