# Supplementary material for: Potassium is a key signal in host-microbiome dysbiosis in periodontitis
Source: PubMed Central journal article supplement (PMC5493431; doi:10.1371/journal.ppat.1006457), 2017-06-20
Supplement: ppat.1006457.s011.pdf [file ppat.1006457.s011.pdf]

S3 Table. A) Total number of bacteria measured by qPCR in inocula and agar plates used on hemolytic activity of dental plaque experiments. B) p-values of Kruskal-Wallis analysis corrected for multiple comparisons. In yellow are differences that were statistically significant.

### A

|           | <b>Inocula</b>                                      | <b>0mM</b>                                           | <b>0.5mM</b>                                         | <b>5mM</b>                                           | <b>50mM</b>                                           |
|-----------|-----------------------------------------------------|------------------------------------------------------|------------------------------------------------------|------------------------------------------------------|-------------------------------------------------------|
| Patient 1 | <b>2.26x10<sup>7</sup></b><br>±3.28x10 <sup>5</sup> | <b>7.14x10<sup>10</sup></b><br>±1.18x10 <sup>9</sup> | <b>7.23x10<sup>10</sup></b><br>±8.68x10 <sup>8</sup> | <b>7.42x10<sup>10</sup></b><br>±3.28x10 <sup>8</sup> | <b>7.59x10<sup>10</sup></b><br>±1.188x10 <sup>9</sup> |
| Patient 2 | <b>3.07x10<sup>7</sup></b><br>±4.03x10 <sup>6</sup> | <b>7.48x10<sup>10</sup></b><br>±8.68x10 <sup>8</sup> | <b>9.67x10<sup>10</sup></b><br>±6.56x10 <sup>8</sup> | <b>9.90x10<sup>10</sup></b><br>±3.13x10 <sup>9</sup> | <b>7.61x10<sup>10</sup></b><br>±4.29x10 <sup>9</sup>  |
| Patient 3 | <b>2.95x10<sup>7</sup></b><br>±1.18x10 <sup>6</sup> | <b>4.65x10<sup>10</sup></b><br>±8.68x10 <sup>8</sup> | <b>4.24x10<sup>10</sup></b><br>±8.68x10 <sup>8</sup> | <b>4.98x10<sup>10</sup></b><br>±4.02x10 <sup>8</sup> | <b>2.67x10<sup>10</sup></b><br>±1.50x10 <sup>9</sup>  |

### B

|                | <b>Inocula</b> | <b>0mM</b> | <b>0.5mM</b> | <b>5mM</b> | <b>50mM</b> |
|----------------|----------------|------------|--------------|------------|-------------|
| <b>Inocula</b> | 1              | 0.0035     | 0.0000       | 0.0002     | 0.0000      |
| <b>0mM</b>     |                | 1          | 0.0866       | 0.2984     | 0.0592      |
| <b>0.5mM</b>   |                |            | 1            | 0.4234     | 0.1567      |
| <b>5mM</b>     |                |            |              | 1          | 0.0674      |
| <b>50mM</b>    |                |            |              |            | 1           |
