# Supplementary material for: Potassium is a key signal in host-microbiome dysbiosis in periodontitis
Source: PubMed Central journal article supplement (PMC5493431; doi:10.1371/journal.ppat.1006457), 2017-06-20
Supplement: ppat.1006457.s013.pdf [file ppat.1006457.s013.pdf]

S5 Table. Hemolytic activity analysis. Kruskal-Wallis analysis corrected for multiple comparisons of percentage of hemolytic activity and growth measured as OD<sub>600</sub> and CFUs after 12 hours of incubation. Tables show corrected p-values. In yellow are comparisons that were statistically significant with a p-value < 0.05.

| <b><i>Prevotella nigrescens</i> ATCC 33563 Hemolytic activity values</b> |     |        |        |        |
|--------------------------------------------------------------------------|-----|--------|--------|--------|
|                                                                          | 0mM | 0.5mM  | 5mM    | 50mM   |
| 0mM                                                                      | 1   | 0.0159 | 0.05   | 0.0332 |
| 0.5mM                                                                    |     | 1      | 0.3523 | 0.0005 |
| 5mM                                                                      |     |        | 1      | 0.0012 |
| 50mM                                                                     |     |        |        | 1      |

| <b><i>Streptococcus mitis</i> NCTC12261 Hemolytic activity values</b> |     |        |        |        |
|-----------------------------------------------------------------------|-----|--------|--------|--------|
|                                                                       | 0mM | 0.5mM  | 5mM    | 50mM   |
| 0mM                                                                   | 1   | 0.0006 | 0.0027 | 0.0112 |
| 0.5mM                                                                 |     | 1      | 0.4336 | 0.0000 |
| 5mM                                                                   |     |        | 1      | 0.0000 |
| 50mM                                                                  |     |        |        | 1      |

S3 Table. Hemolytic activity analysis. Kruskal-Wallis analysis corrected for multiple comparisons of percentage of hemolytic activity and growth measured as OD<sub>600</sub> and CFUs after 12 hours of incubation. Tables show corrected p-values. In yellow are comparisons that were statistically significant with a p-value < 0.050.

| <b><i>Prevotella nigrescens</i> ATCC 33563 OD<sub>600</sub> after 12 hours of incubation</b> |     |          |          |          |
|----------------------------------------------------------------------------------------------|-----|----------|----------|----------|
|                                                                                              | 0mM | 0.5mM    | 5mM      | 50mM     |
| 0mM                                                                                          | 1   | 0.781349 | 0.781349 | 0.781349 |
| 0.5mM                                                                                        |     | 1        | 0.781349 | 1        |
| 5mM                                                                                          |     |          | 1        | 0.781349 |
| 50mM                                                                                         |     |          |          | 1        |

| <b><i>Prevotella nigrescens</i> NTCC 9336 OD<sub>600</sub> after 12 hours of incubation</b> |     |          |          |          |
|---------------------------------------------------------------------------------------------|-----|----------|----------|----------|
|                                                                                             | 0mM | 0.5mM    | 5mM      | 50mM     |
| 0mM                                                                                         | 1   | 0.799349 | 0.470992 | 0.827564 |
| 0.5mM                                                                                       |     | 1        | 0.470992 | 0.785871 |
| 5mM                                                                                         |     |          | 1        | 0.470992 |
| 50mM                                                                                        |     |          |          | 1        |

| <b><i>Streptococcus mitis</i> NCTC12261 OD<sub>600</sub> after 12 hours of incubation</b> |     |       |          |          |
|-------------------------------------------------------------------------------------------|-----|-------|----------|----------|
|                                                                                           | 0mM | 0.5mM | 5mM      | 50mM     |
| 0mM                                                                                       | 1   | 1     | 0.075293 | 0.075293 |
| 0.5mM                                                                                     |     | 1     | 0.075293 | 0.075293 |
| 5mM                                                                                       |     |       | 1        | 0.041412 |
| 50mM                                                                                      |     |       |          | 1        |

S3 Table. Hemolytic activity analysis. Kruskal-Wallis analysis corrected for multiple comparisons of percentage of hemolytic activity and growth measured as OD<sub>600</sub> and CFUs after 12 hours of incubation. Tables show corrected p-values. In yellow are comparisons that were statistically significant with a p-value < 0.050.

| <b><i>Prevotella nigrescens</i> ATCC 33563 CFUs after 12 hours of incubation</b> |     |        |        |        |
|----------------------------------------------------------------------------------|-----|--------|--------|--------|
|                                                                                  | 0mM | 0.5mM  | 5mM    | 50mM   |
| 0mM                                                                              | 1   | 0.7813 | 0.7813 | 0.7813 |
| 0.5mM                                                                            |     | 1      | 0.7813 | 1.0000 |
| 5mM                                                                              |     |        | 1      | 0.7813 |
| 50mM                                                                             |     |        |        | 1      |

| <b><i>Prevotella nigrescens</i> NTCC 9336 CFUs after 12 hours of incubation</b> |     |        |        |        |
|---------------------------------------------------------------------------------|-----|--------|--------|--------|
|                                                                                 | 0mM | 0.5mM  | 5mM    | 50mM   |
| 0mM                                                                             | 1   | 0.7993 | 0.8276 | 0.4710 |
| 0.5mM                                                                           |     | 1      | 0.4710 | 0.7859 |
| 5mM                                                                             |     |        | 1      | 0.4710 |
| 50mM                                                                            |     |        |        | 1      |

| <b><i>Streptococcus mitis</i> NCTC12261 CFUs after 12 hours of incubation</b> |     |        |        |        |
|-------------------------------------------------------------------------------|-----|--------|--------|--------|
|                                                                               | 0mM | 0.5mM  | 5mM    | 50mM   |
| 0mM                                                                           | 1   | 1.0000 | 0.0753 | 0.0753 |
| 0.5mM                                                                         |     | 1      | 0.0753 | 0.0753 |
| 5mM                                                                           |     |        | 1      | 0.0414 |
| 50mM                                                                          |     |        |        | 1      |
