# Supplementary material for: Potassium is a key signal in host-microbiome dysbiosis in periodontitis
Source: PubMed Central journal article supplement (PMC5493431; doi:10.1371/journal.ppat.1006457), 2017-06-20
Supplement: ppat.1006457.s015.pdf [file ppat.1006457.s015.pdf]

S7 Table A. IL-6 and TNF- $\alpha$  expression differences due to the addition of dental plaque. Kruskal-Wallis analysis corrected for multiple comparisons. In yellow are comparisons that were statistically significant with corrected p-value < 0.05.

| <b>IL-6</b>                    |            |            |             |              |
|--------------------------------|------------|------------|-------------|--------------|
|                                | Plaque 0mM | Plaque 5mM | Plaque 50mM | Plaque 100mM |
| No Plaque 0mM                  | 0.1040     |            |             |              |
| No Plaque 5mM                  |            | 0.1260     |             |              |
| No Plaque 50mM                 |            |            | 0.2003      |              |
| No Plaque 100mM                |            |            |             | 0.2957       |
| <b>TNF-<math>\alpha</math></b> |            |            |             |              |
| No Plaque 0mM                  | 0.8562     |            |             |              |
| No Plaque 5mM                  |            | 0.0044     |             |              |
| No Plaque 50mM                 |            |            | 0.4155      |              |
| No Plaque 100mM                |            |            |             | 0.1365       |

S7 Table B. IL-6 and TNF- $\alpha$  expression differences due to K<sup>+</sup> concentration regardless of the addition of dental plaque. Kruskal-Wallis analysis corrected for multiple comparisons. In yellow are comparisons that were statistically significant with corrected p-value < 0.05.

| <b>IL-6</b>                    |     |        |        |        |
|--------------------------------|-----|--------|--------|--------|
|                                | 0mM | 5mM    | 50mM   | 100mM  |
| 0mM                            | 1   | 0.5232 | 0.5571 | 0.0037 |
| 5mM                            |     | 1      | 0.8333 | 0.0115 |
| 50mM                           |     |        | 1      | 0.0106 |
| 100mM                          |     |        |        | 1      |
| <b>TNF-<math>\alpha</math></b> |     |        |        |        |
| 0mM                            | 1   | 0.1145 | 0.0002 | 0.0000 |
| 5mM                            |     | 1      | 0.0000 | 0.0000 |
| 50mM                           |     |        | 1      | 0.0016 |
| 100mM                          |     |        |        | 1      |
