# Supplementary material for: Potassium is a key signal in host-microbiome dysbiosis in periodontitis
Source: PubMed Central journal article supplement (PMC5493431; doi:10.1371/journal.ppat.1006457), 2017-06-20
Supplement: ppat.1006457.s016.pdf [file ppat.1006457.s016.pdf]

S8 Table. Kruskal-Wallis analysis corrected for multiple comparisons for expression levels of hBD-3. See Figure 6. In yellow are comparisons that were considered statistically significant ( $p$ -value  $< 0.05$ ).

|                  | Negative control | No Plaque 0mM | No Plaque 5mM | No Plaque 50mM | Plaque 0mM | Plaque 5mM | Plaque 50mM |
|------------------|------------------|---------------|---------------|----------------|------------|------------|-------------|
| Negative control |                  | 0             | 0             | 0              | 0          | 0          | 0           |
| No Plaque 0mM    |                  |               | 0             | 0.0113         | 0.0021     | 0          | 0           |
| No Plaque 5mM    |                  |               |               | 0.0002         | 0.0112     | 0.0113     | 0.6420      |
| No Plaque 50mM   |                  |               |               |                | 0.3318     | 0          | 0           |
| Plaque 0mM       |                  |               |               |                |            | 0          | 0.0020      |
| Plaque 5mM       |                  |               |               |                |            |            | 0.0198      |
| Plaque 50mM      |                  |               |               |                |            |            |             |
