# Supplementary material for: Potassium is a key signal in host-microbiome dysbiosis in periodontitis
Source: PubMed Central journal article supplement (PMC5493431; doi:10.1371/journal.ppat.1006457), 2017-06-20
Supplement: ppat.1006457.s017.pdf [file ppat.1006457.s017.pdf]

S9 Table. Analysis of Variance Tables. Output of the two-way ANOVA analysis to assess for significant interactions in expression levels of IL-6 and TNF- $\alpha$ . See S6 Fig. In yellow are comparisons that were statistically significant.

### IL-6

| Response:value                                  |    |         |         |         |           |     |
|-------------------------------------------------|----|---------|---------|---------|-----------|-----|
|                                                 | Df | Sum Sq  | Mean Sq | F-value | Pr(>F)    |     |
| Presence of plaque                              | 1  | 0.150   | 0.150   | 0.0176  | 0.8961168 |     |
| K <sup>+</sup> concentration                    | 3  | 239.146 | 79.715  | 9.3266  | 0.0008424 | *** |
| Presence of plaque:K <sup>+</sup> concentration | 3  | 98.895  | 32.965  | 3.8568  | 0.0298345 | *   |
| Residuals                                       | 16 | 136.754 | 8.547   |         |           |     |

### TNF- $\alpha$

| Response:value                                  |    |        |         |         |           |     |
|-------------------------------------------------|----|--------|---------|---------|-----------|-----|
|                                                 | Df | Sum Sq | Mean Sq | F-value | Pr(>F)    |     |
| Presence of plaque                              | 1  | 50.1   | 50.14   | 3.7080  | 0.072113  | .   |
| K <sup>+</sup> concentration                    | 3  | 3834.3 | 1278.09 | 94.5164 | 2.159e-10 | *** |
| Presence of plaque:K <sup>+</sup> concentration | 3  | 349.0  | 116.34  | 8.6038  | 0.001247  | **  |
| Residuals                                       | 16 | 216.4  | 13.52   |         |           |     |

---

Significance codes: 0 '\*\*\*' 0.001 '\*\*' 0.01 '\*' 0.05 '.' 0.1
