# Supplementary material for: Potassium is a key signal in host-microbiome dysbiosis in periodontitis
Source: PubMed Central journal article supplement (PMC5493431; doi:10.1371/journal.ppat.1006457), 2017-06-20
Supplement: ppat.1006457.s018.pdf [file ppat.1006457.s018.pdf]

S10 Table. Analysis of Variance Table. Output of the two-way ANOVA analysis to assess for significant interactions in expression levels of hBD-3. See Figure 6. In yellow are comparisons that were statistically significant.

| Response:value                                        |    |        |         |         |           |        |
|-------------------------------------------------------|----|--------|---------|---------|-----------|--------|
|                                                       | Df | Sum Sq | Mean Sq | F       | value     | Pr(>F) |
| Presence of plaque                                    | 1  | 23.476 | 23.4758 | 31.3052 | 2.254e-07 | ***    |
| K+ concentration                                      | 2  | 34.776 | 17.3879 | 23.1869 | 7.011e-09 | ***    |
| Presence of plaque:<br>K+ concentration               | 2  | 0.624  | 0.3118  | 0.4158  | 0.661     |        |
| Residuals                                             | 92 | 68.991 | 0.7499  |         |           |        |
| Signif. Codes: 0 '***' ; 0.001 '**' ; 0.01 '*' ; 0.05 |    |        |         |         |           |        |
