# Supplementary material for: Potassium is a key signal in host-microbiome dysbiosis in periodontitis
Source: PLoS Pathog. 2017 Jun 20;13(6):e1006457. doi: 10.1371/journal.ppat.1006457 (PMC5493431; doi:10.1371/journal.ppat.1006457)
Supplement: S6 Table — Kruskal-Wallis analysis corrected for multiple comparisons. In yellow are comparisons that were statistically significant with corrected p-value < 0.05. In green are comparisons that were statistically significant with corrected p-value < 0.1. NP, no plaque. P, plaque. (PDF) [file ppat.1006457.s014.pdf]

S6 Table. Differences in cytokine expression due to K<sup>+</sup> concentration and presence or absence of dental plaque. Kruskal-Wallis analysis corrected for multiple comparisons. In yellow are comparisons that were statistically significant with corrected p-value < 0.05. In green are comparisons that were statistically significant with corrected p-value < 0.1. NP, no plaque. P, plaque.

|                           | NP+0mM<br>IFN- $\gamma$ | NP+5mM<br>IFN- $\gamma$ | NP+50mM<br>IFN- $\gamma$ | NP+100mM<br>IFN- $\gamma$ | P+0mM<br>IFN- $\gamma$ | P+5mM<br>IFN- $\gamma$ | P+50mM<br>IFN- $\gamma$ | P+100mM<br>IFN- $\gamma$ |
|---------------------------|-------------------------|-------------------------|--------------------------|---------------------------|------------------------|------------------------|-------------------------|--------------------------|
| NP+0mM<br>IFN- $\gamma$   | 1                       | 0.9772                  | 0.6904                   | 0.9772                    | 0.9772                 | 0.9772                 | 0.9772                  | 0.9772                   |
| NP+5mM<br>IFN- $\gamma$   |                         | 1                       | 0.6904                   | 0.9772                    | 0.9772                 | 0.9772                 | 0.9772                  | 0.9772                   |
| NP+50mM<br>IFN- $\gamma$  |                         |                         | 1                        | 0.6904                    | 0.9181                 | 0.6904                 | 0.7731                  | 0.6904                   |
| NP+100mM<br>IFN- $\gamma$ |                         |                         |                          | 1                         | 0.9772                 | 0.9772                 | 0.9772                  | 0.9772                   |
| P+0mM<br>IFN- $\gamma$    |                         |                         |                          |                           | 1                      | 0.9772                 | 0.9772                  | 0.9772                   |
| P+5mM<br>IFN- $\gamma$    |                         |                         |                          |                           |                        | 1                      | 0.9772                  | 0.9772                   |
| P+50mM<br>IFN- $\gamma$   |                         |                         |                          |                           |                        |                        | 1                       | 0.9772                   |
| P+100mM<br>IFN- $\gamma$  |                         |                         |                          |                           |                        |                        |                         | 1                        |

|                   | NP+0mM<br>IL-10 | NP+5mM<br>IL-10 | NP+50mM<br>IL-10 | NP+100mM<br>IL-10 | P+0mM<br>IL-10 | P+5mM<br>IL-10 | P+50mM<br>IL-10 | P+100mM<br>IL-10 |
|-------------------|-----------------|-----------------|------------------|-------------------|----------------|----------------|-----------------|------------------|
| NP+0mM<br>IL-10   | 1               | 0.9563          | 0.9563           | 0.9563            | 0.9563         | 0.9563         | 0.9563          | 0.9563           |
| NP+5mM<br>IL-10   |                 | 1               | 0.9563           | 0.9563            | 0.9563         | 0.9563         | 0.9563          | 0.9563           |
| NP+50mM<br>IL-10  |                 |                 | 1                | 0.9563            | 0.9563         | 0.9563         | 0.9563          | 0.9563           |
| NP+100mM<br>IL-10 |                 |                 |                  | 1                 | 0.9563         | 0.9563         | 0.9563          | 0.9563           |
| P+0mM<br>IL-10    |                 |                 |                  |                   | 1              | 0.9563         | 0.9563          | 0.9563           |
| P+5mM<br>IL-10    |                 |                 |                  |                   |                | 1              | 0.9563          | 0.9563           |
| P+50mM<br>IL-10   |                 |                 |                  |                   |                |                | 1               | 0.9563           |
| P+100mM<br>IL-10  |                 |                 |                  |                   |                |                |                 | 1                |

S6 Table (Cont.). Differences in cytokine expression due to K<sup>+</sup> concentration and presence or absence of dental plaque. Kruskal-Wallis analysis corrected for multiple comparisons. In yellow are comparisons that were statistically significant with corrected p-value < 0.05. In green are comparisons that were statistically significant with corrected p-value < 0.1. NP, no plaque. P, plaque.

|                    | NP+0mM<br>IL-17A | NP+5mM<br>IL-17A | NP+50mM<br>IL-17A | NP+100mM<br>IL-17A | P+0mM<br>IL-17A | P+5mM<br>IL-17A | P+50mM<br>IL-17A | P+100mM<br>IL-17A |
|--------------------|------------------|------------------|-------------------|--------------------|-----------------|-----------------|------------------|-------------------|
| NP+0mM<br>IL-17A   | 1                | 0.9750           | 0.3072            | 0.9750             | 0.3072          | 0.9750          | 0.3072           | 0.9750            |
| NP+5mM<br>IL-17A   |                  | 1                | 0.4013            | 0.9750             | 0.4141          | 0.9750          | 0.3072           | 0.9750            |
| NP+50mM<br>IL-17A  |                  |                  | 1                 | 0.3072             | 0.9750          | 0.3072          | 0.9750           | 0.3072            |
| NP+100mM<br>IL-17A |                  |                  |                   | 1                  | 0.3072          | 0.9750          | 0.3072           | 0.9750            |
| P+0mM<br>IL-17A    |                  |                  |                   |                    | 1               | 0.3160          | 0.9750           | 0.3072            |
| P+5mM<br>IL-17A    |                  |                  |                   |                    |                 | 1               | 0.3072           | 0.9750            |
| P+50mM<br>IL-17A   |                  |                  |                   |                    |                 |                 | 1                | 0.3072            |
| P+100mM<br>IL-17A  |                  |                  |                   |                    |                 |                 |                  | 1                 |

|                          | NP+0mM<br>IL-1 $\beta$ | NP+5mM<br>IL-1 $\beta$ | NP+50mM<br>IL-1 $\beta$ | NP+100mM<br>IL-1 $\beta$ | P+0mM<br>IL-1 $\beta$ | P+5mM<br>IL-1 $\beta$ | P+50mM<br>IL-1 $\beta$ | P+100mM<br>IL-1 $\beta$ |
|--------------------------|------------------------|------------------------|-------------------------|--------------------------|-----------------------|-----------------------|------------------------|-------------------------|
| NP+0mM<br>IL-1 $\beta$   | 1                      | 0.7358                 | 0.7358                  | 0.9013                   | 0.9892                | 0.7358                | 0.6827                 | 0.9892                  |
| NP+5mM<br>IL-1 $\beta$   |                        | 1                      | 0.6827                  | 0.8868                   | 0.7358                | 0.9892                | 0.6656                 | 0.7358                  |
| NP+50mM<br>IL-1 $\beta$  |                        |                        | 1                       | 0.7358                   | 0.7358                | 0.6827                | 0.8323                 | 0.7358                  |
| NP+100mM<br>IL-1 $\beta$ |                        |                        |                         | 1                        | 0.9013                | 0.8736                | 0.6827                 | 0.9013                  |
| P+0mM<br>IL-1 $\beta$    |                        |                        |                         |                          | 1                     | 0.7358                | 0.6827                 | 1                       |
| P+5mM<br>IL-1 $\beta$    |                        |                        |                         |                          |                       | 1                     | 0.6656                 | 0.7358                  |
| P+50mM<br>IL-1 $\beta$   |                        |                        |                         |                          |                       |                       | 1                      | 0.6827                  |
| P+100mM<br>IL-1 $\beta$  |                        |                        |                         |                          |                       |                       |                        | 1                       |

S6 Table (Cont.). Differences in cytokine expression due to K<sup>+</sup> concentration and presence or absence of dental plaque. Kruskal-Wallis analysis corrected for multiple comparisons. In yellow are comparisons that were statistically significant with corrected p-value < 0.05. In green are comparisons that were statistically significant with corrected p-value < 0.1. NP, no plaque. P, plaque.

|                  | NP+0mM<br>IL-6 | NP+5mM<br>IL-6 | NP+50mM<br>IL-6 | NP+100mM<br>IL-6 | P+0mM<br>IL-6 | P+5mM<br>IL-6 | P+50mM<br>IL-6 | P+100mM<br>IL-6 |
|------------------|----------------|----------------|-----------------|------------------|---------------|---------------|----------------|-----------------|
| NP+0mM<br>IL-6   | 1              | 0.4402         | 0.0608          | 0.0026           | 0.1040        | 0.0361        | 0.4402         | 0.0088          |
| NP+5mM<br>IL-6   |                | 1              | 0.2003          | 0.0055           | 0.2957        | 0.1260        | 1              | 0.0341          |
| NP+50mM<br>IL-6  |                |                | 1               | 0.0562           | 0.7479        | 0.0951        | 0.2003         | 0.2957          |
| NP+100mM<br>IL-6 |                |                |                 | 1                | 0.0341        | 0.0951        | 0.0055         | 0.2957          |
| P+0mM<br>IL-6    |                |                |                 |                  | 1             | 0.5354        | 0.2957         | 0.1936          |
| P+5mM<br>IL-6    |                |                |                 |                  |               | 1             | 0.1260         | 0.4234          |
| P+50mM<br>IL-6   |                |                |                 |                  |               |               | 1              | 0.0341          |
| P+100mM<br>IL-6  |                |                |                 |                  |               |               |                | 1               |

|                           | NP+0mM<br>TNF- $\alpha$ | NP+5mM<br>TNF- $\alpha$ | NP+50mM<br>TNF- $\alpha$ | NP+100mM<br>TNF- $\alpha$ | P+0mM<br>TNF- $\alpha$ | P+5mM<br>TNF- $\alpha$ | P+50mM<br>TNF- $\alpha$ | P+100mM<br>TNF- $\alpha$ |
|---------------------------|-------------------------|-------------------------|--------------------------|---------------------------|------------------------|------------------------|-------------------------|--------------------------|
| NP+0mM<br>TNF- $\alpha$   | 1                       | 0.7727                  | 0.0005                   | 0.0000                    | 0.8562                 | 0.0086                 | 0.0026                  | 0.0000                   |
| NP+5mM<br>TNF- $\alpha$   |                         | 1                       | 0.0009                   | 0.0000                    | 0.8562                 | 0.0044                 | 0.0044                  | 0.0000                   |
| NP+50mM<br>TNF- $\alpha$  |                         |                         | 1                        | 0.0729                    | 0.0006                 | 0.0000                 | 0.4155                  | 0.0033                   |
| NP+100mM<br>TNF- $\alpha$ |                         |                         |                          | 1                         | 0.0000                 | 0.0000                 | 0.0121                  | 0.1365                   |
| P+0mM<br>TNF- $\alpha$    |                         |                         |                          |                           | 1                      | 0.0061                 | 0.0033                  | 0.0000                   |
| P+5mM<br>TNF- $\alpha$    |                         |                         |                          |                           |                        | 1                      | 0.0000                  | 0.0000                   |
| P+50mM<br>TNF- $\alpha$   |                         |                         |                          |                           |                        |                        | 1                       | 0.0006                   |
| P+100mM<br>TNF- $\alpha$  |                         |                         |                          |                           |                        |                        |                         | 1                        |
